# Supplementary material for: Increased iNOS and Nitrosative Stress in Dopaminergic Neurons of MDMA-Exposed Rats
Source: MDPI journal article supplement (doi:10.3390/ijms20051242), 2019-03-12
Supplement: s1 [file s1]

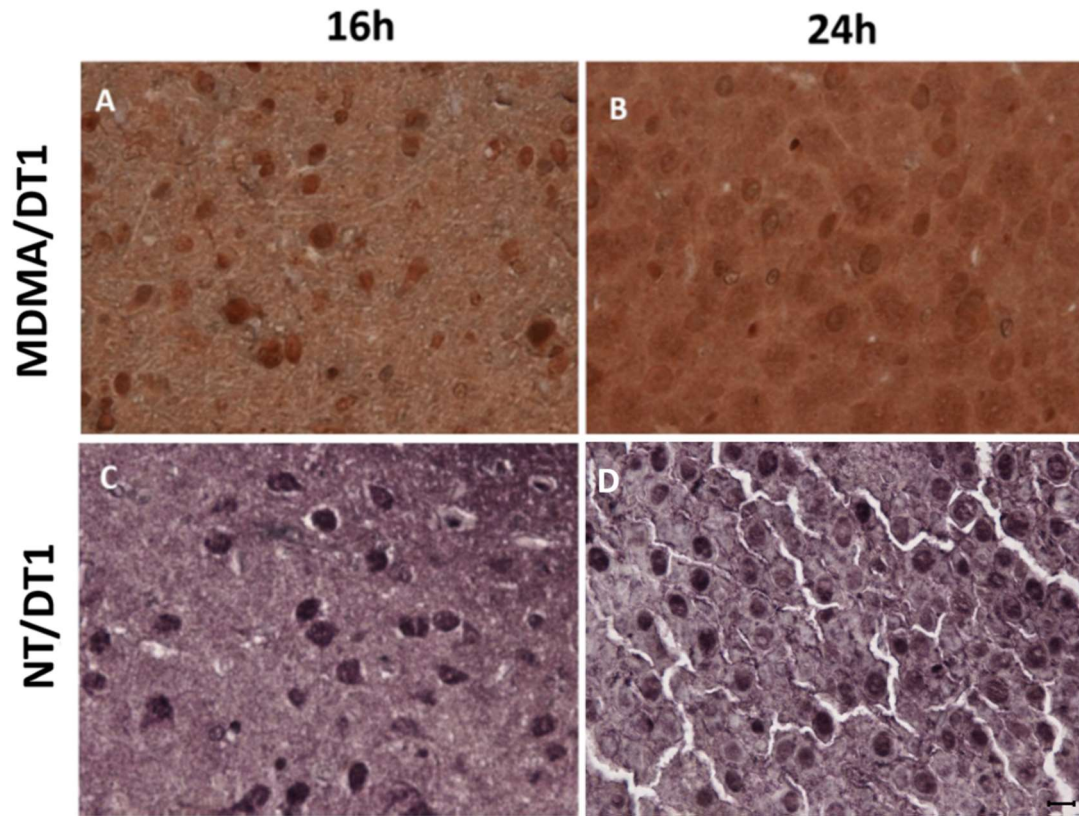

**Figure S1.** MDMA/DT1 and NT/DT1 double immunostaining in rats receiving MDMA and sacrificed after 16 or 24 h. (A,B) Representative images (light microscopy, 40×) of MDMA/DT1 double immunostaining in the frontal cortex of rats receiving MDMA and sacrificed after (A) 16 h and (B) 24 h from its administration. (C,D) Representative images (light microscopy, 40×) of NT/DT1 double immunostaining in the frontal cortex of rats receiving MDMA and sacrificed after (C) 16 h and (D) 24 h from its administration. Scale bar for images in panels (A–D) = 50  $\mu$ m.

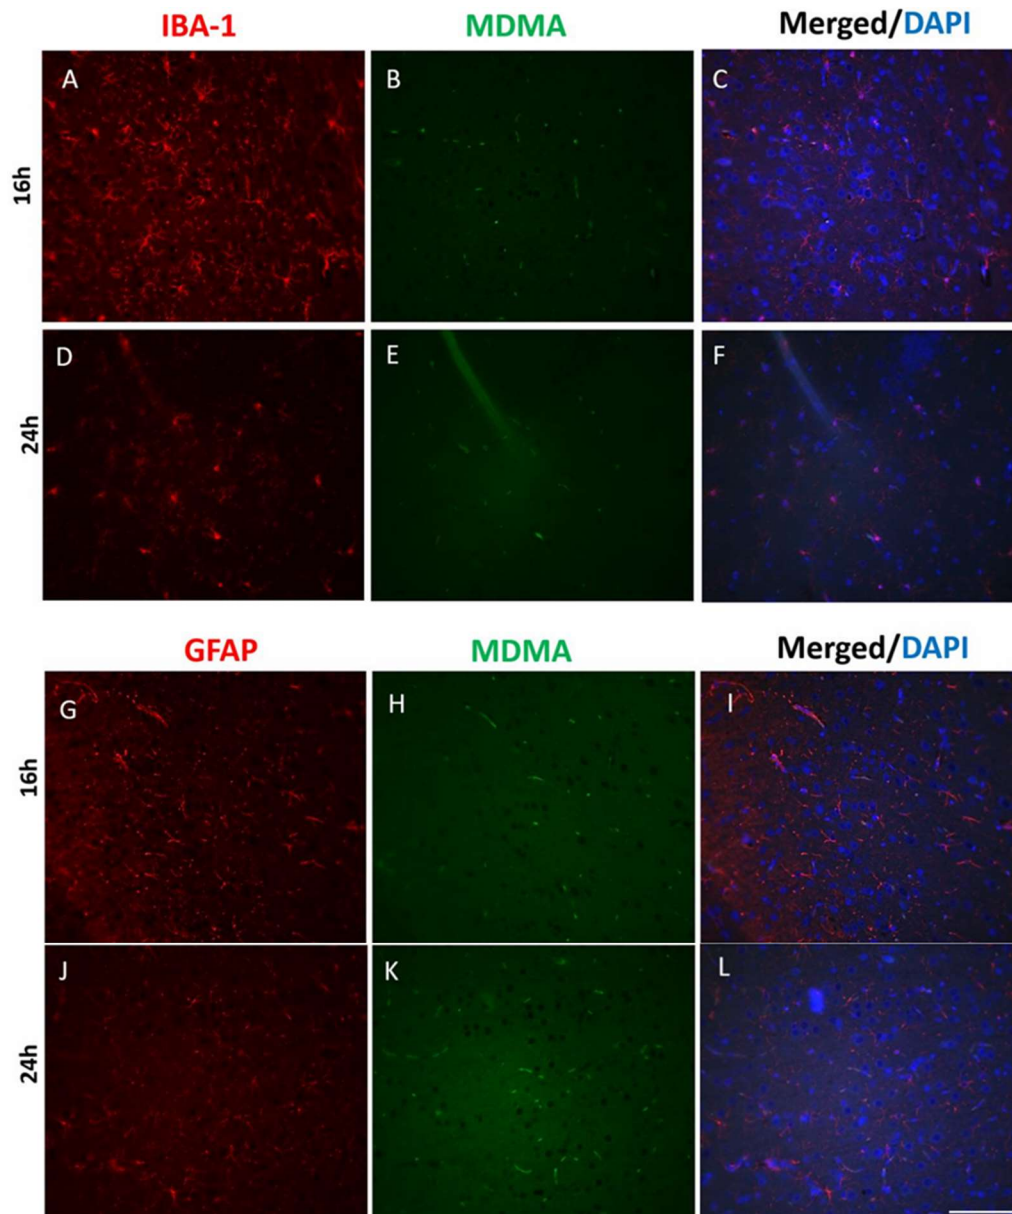

**Figure S2.** IBA-1/MDMA and GFAP/MDMA double immunofluorescence in rats receiving MDMA and sacrificed after 16 or 24 h. (A–C) Representative immunofluorescence images (light microscopy, 40×) of IBA-1 (A-red staining)/MDMA (B-green staining) and merged images with DAPI (C-blue staining) in the frontal cortex of rats receiving MDMA and sacrificed after 16 h from its administration. (D–F) Representative immunofluorescence images (light microscopy, 40×) of IBA-1 (D-red staining)/MDMA (E-green staining) and merged images with DAPI (F-blue staining) in the frontal cortex of rats receiving MDMA and sacrificed after 24 h from its administration. (G–I) Representative immunofluorescence images (light microscopy, 40×) of GFAP (G-red staining)/MDMA (H-green staining) and merged images with DAPI (I-blue staining) in the frontal cortex of rats receiving MDMA and sacrificed after 16 h from its administration. (J–L) Representative immunofluorescence images (light microscopy, 40×) of GFAP (J-red staining)/MDMA (K-green staining) and merged images with DAPI (L-blue staining) in the frontal cortex of rats receiving MDMA and sacrificed after 24 h from its administration. Scale bar for images in panels (A–L) = 100  $\mu$ m.

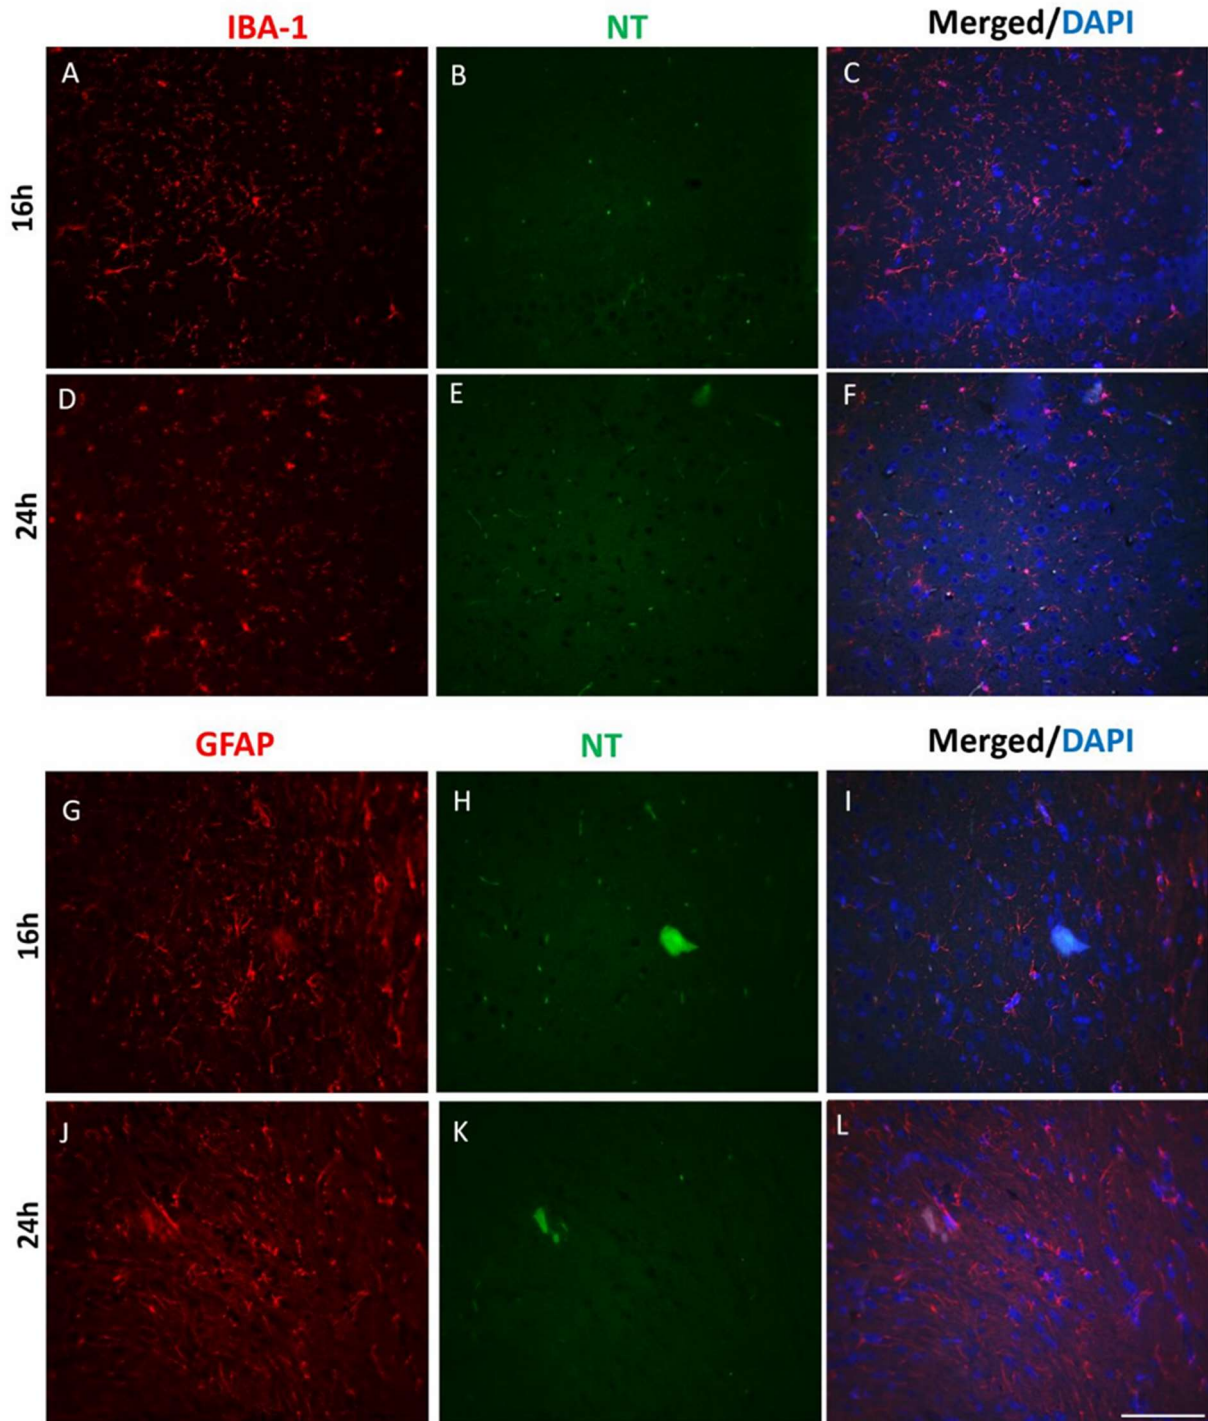

**Figure S3.** IBA-1/NT and GFAP/NT double immunofluorescence in rats receiving MDMA and sacrificed after 16 or 24 h. (A–C) Representative immunofluorescence images (light microscopy, 40×) of IBA-1 (A-red staining)/NT (B-green staining) and merged images with DAPI (C-blue staining) in the frontal cortex of rats receiving MDMA and sacrificed after 16 h from its administration. (D–F) Representative immunofluorescence images (light microscopy, 40×) of IBA-1 (D-red staining)/NT (E-green staining) and merged images with DAPI (F-blue staining) in the frontal cortex of rats receiving MDMA and sacrificed after 24 h from its administration. (G–I) Representative immunofluorescence images (light microscopy, 40×) of GFAP (G-red staining)/NT (H-green staining) and merged images with DAPI (I-blue staining) in the frontal cortex of rats receiving MDMA and sacrificed after 16 h from its administration. (J–L) Representative immunofluorescence images (light microscopy, 40×) of GFAP (J-red staining)/NT (K-green staining) and merged images with DAPI (L-blue staining) in the frontal cortex of rats receiving MDMA and sacrificed after 24 h from its administration. Scale bar for images in panels (A–L) = 100  $\mu$ m.



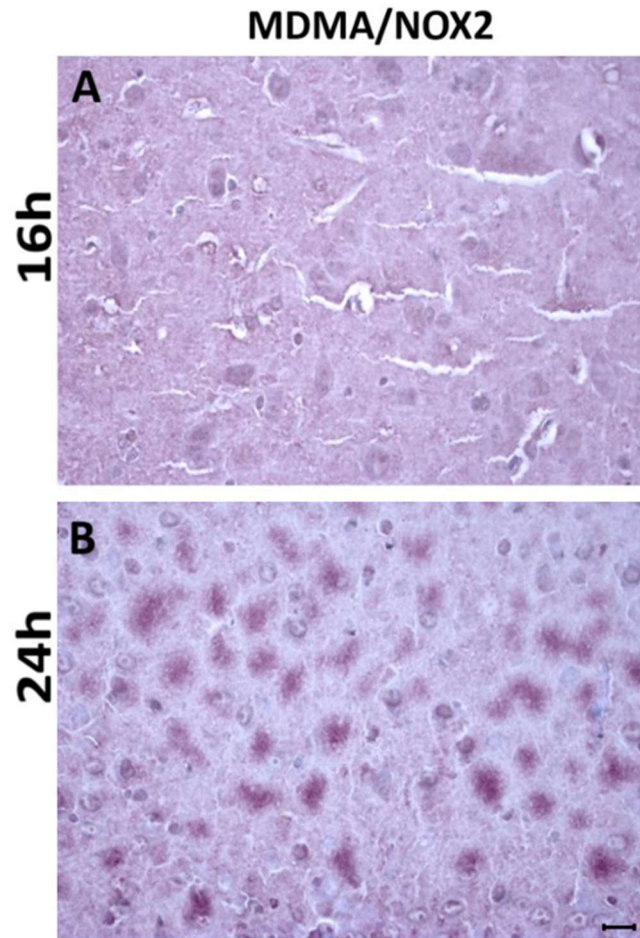

**Figure S4.** MDMA/NOX2 double immunostaining in rats receiving MDMA and sacrificed after 16 or 24 h. (**A,B**) Representative images (light microscopy, 40×) of MDMA/NOX2 double immunostaining in the frontal cortex of rats receiving MDMA and sacrificed after (**A**) 16 h and (**B**) 24 h from its administration. Scale bar for images in panels (**A,B**) = 50  $\mu$ m.
